# Supplementary material
Source: MDPI journal article supplement (https://www.mdpi.com/2673-9992/14/1/46)
Supplement: s1 [file s1]

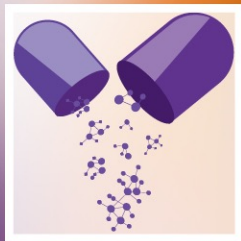

# The 8th International Electronic Conference on Medicinal Chemistry (ECMC 2022)

01-30 NOVEMBER 2022 | ONLINE

## Synthesis and Antifungal Activity of Thioxanthone Derivatives

Chaired by **DR. ALFREDO BERZAL-HERRANZ**;  
Co-Chaired by **PROF. DR. MARIA EMÍLIA SOUSA**

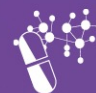

*pharmaceuticals*

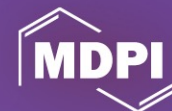

**Joana Cardoso**<sup>1,2,3</sup>, **Joana Freitas-Silva**<sup>2,3</sup>, **Fernando Durães**<sup>1,3</sup>, **Madalena Pinto**<sup>1,3</sup>,  
**Emília Sousa**<sup>1,3,\*</sup>, and **Eugénia Pinto**<sup>2,3,\*</sup>

<sup>1</sup> Laboratory of Organic and Pharmaceutical Chemistry, Faculty of Pharmacy, University of Porto, 4050-313 Porto, Portugal;

<sup>2</sup> Laboratory of Microbiology, Faculty of Pharmacy, University of Porto, 4050-313 Porto, Portugal;

<sup>3</sup> Interdisciplinary Centre of Marine and Environmental Research (CIIMAR), University of Porto, 4450-208 Matosinhos, Portugal.

\* Corresponding authors: [esousa@ff.up.pt](mailto:esousa@ff.up.pt); [epinto@ff.up.pt](mailto:epinto@ff.up.pt).

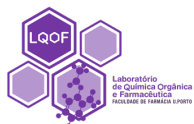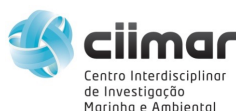

# Synthesis and Antifungal Activity of Thioxanthone Derivatives

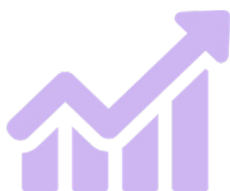

Fungal infections

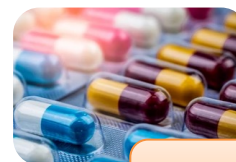

Potential new antifungal drugs

Synthetic small thioxanthenes

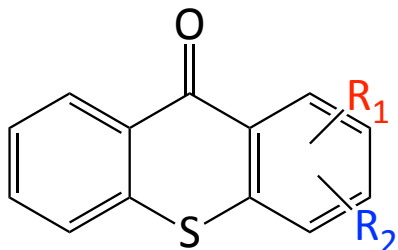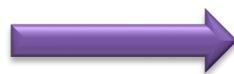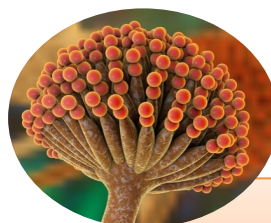

Broad antifungal activity against filamentous fungi strains, including azole-resistant

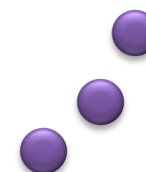

**Abstract:** Systemic fungal infections by filamentous fungi, particularly in the immunocompromised population, represent a serious threat to public health. The increase of resistant strains to classic antifungal drugs, especially azoles, is a global health problem and some infections become almost impossible to treat. Furthermore, the emergence of multidrug-resistant fungal species, such as *Scedosporium* spp. and *Fusarium* spp., as etiological agents, pose a challenge in the treatment. On the other hand, superficial fungal infections by dermatophytes have a high incidence affecting around 20 to 30 % of the healthy human population. Therefore, the discovery and development of new antifungal compounds with a broad-spectrum and able to modulating and/or eradicating antifungal resistance have become an essential and urgent strategy. Taking into account that thioxanthenes are privileged structures and bioisosteres of xanthenes, three thioxanthenes were synthesized and, subsequently, their activity as potential agents against filamentous fungi were evaluated. Minimum inhibitory concentration and minimum lethal concentration was tested against clinically relevant species, using the broth microdilution method. The derivatives were synthesized through aromatic nucleophilic substitution reactions, using a chlorinated thioxanthone and a primary amine as building blocks, and showed interesting results against most of the isolates tested, including strains intrinsically resistant or that acquired resistance to fluconazole or other azoles; among the tested compounds, one of the thioxanthone showed more promising activity. These findings highlight the potential value of the thioxanthone derivatives as new models for antifungal agents for the treatment of systemic and superficial fungal infections.

**Keywords:** thioxanthenes; antifungal activity; fungal infections

# Introduction

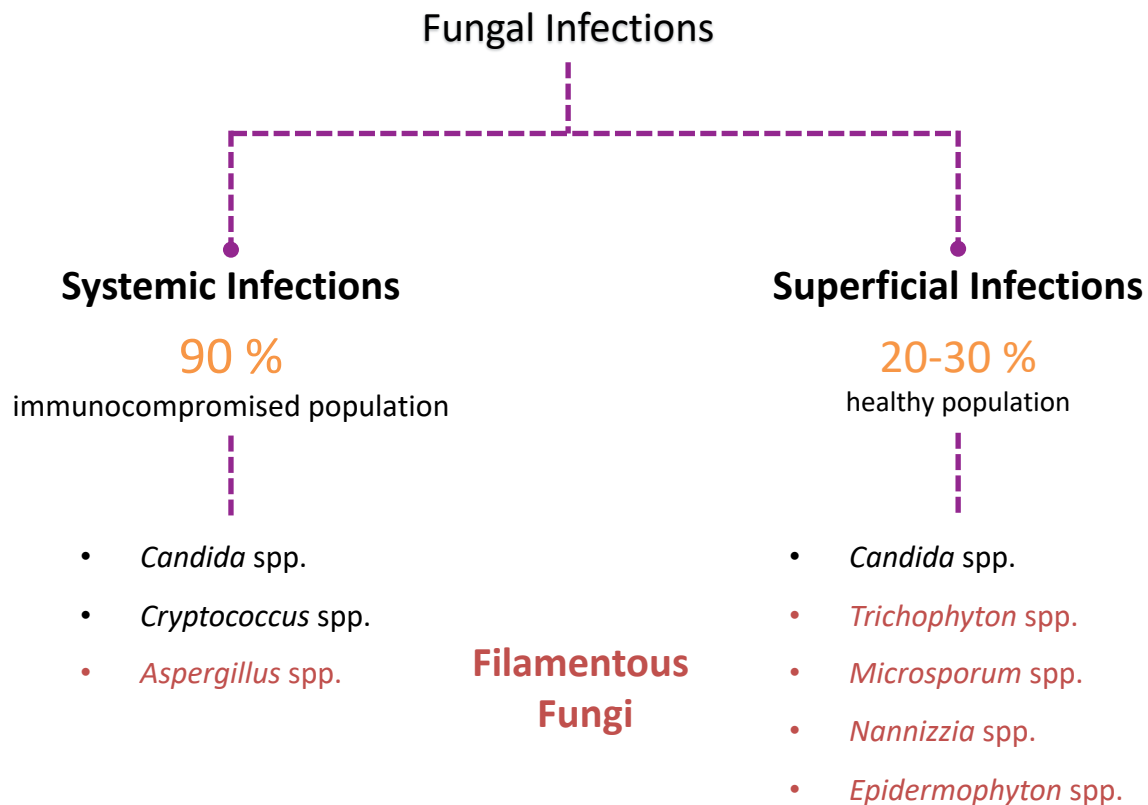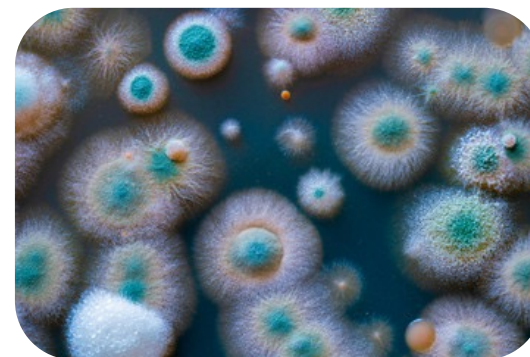

Resistance to antifungals agents

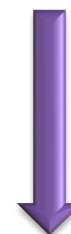

New and effective antifungal agents

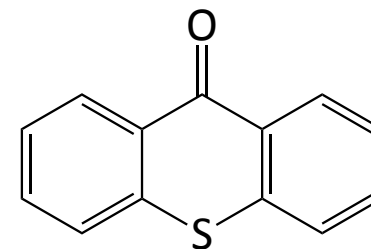

Campoy, S.; *et al.*, Antifungals. *Biochem. Pharmacol.* **2017**.

Ngo, H. X.; *et al.*, A complex game of hide and seek: the search for new antifungals. *MedChemComm.* **2016**.

Kaushik, N.; *et al.*, Superficial Fungal Infections. *Prim. Care Clin. Office Pract.* **2015**.

Fuentefria, A. M.; *et al.*, Antifungals discovery: an insight into new strategies to combat antifungal resistance. *Lett. Appl. Microbiol.* **2018**.

ECMC  
2022

The 8th International Electronic  
Conference on Medicinal Chemistry  
01-30 NOVEMBER 2022 | ONLINE



# Results and Discussion

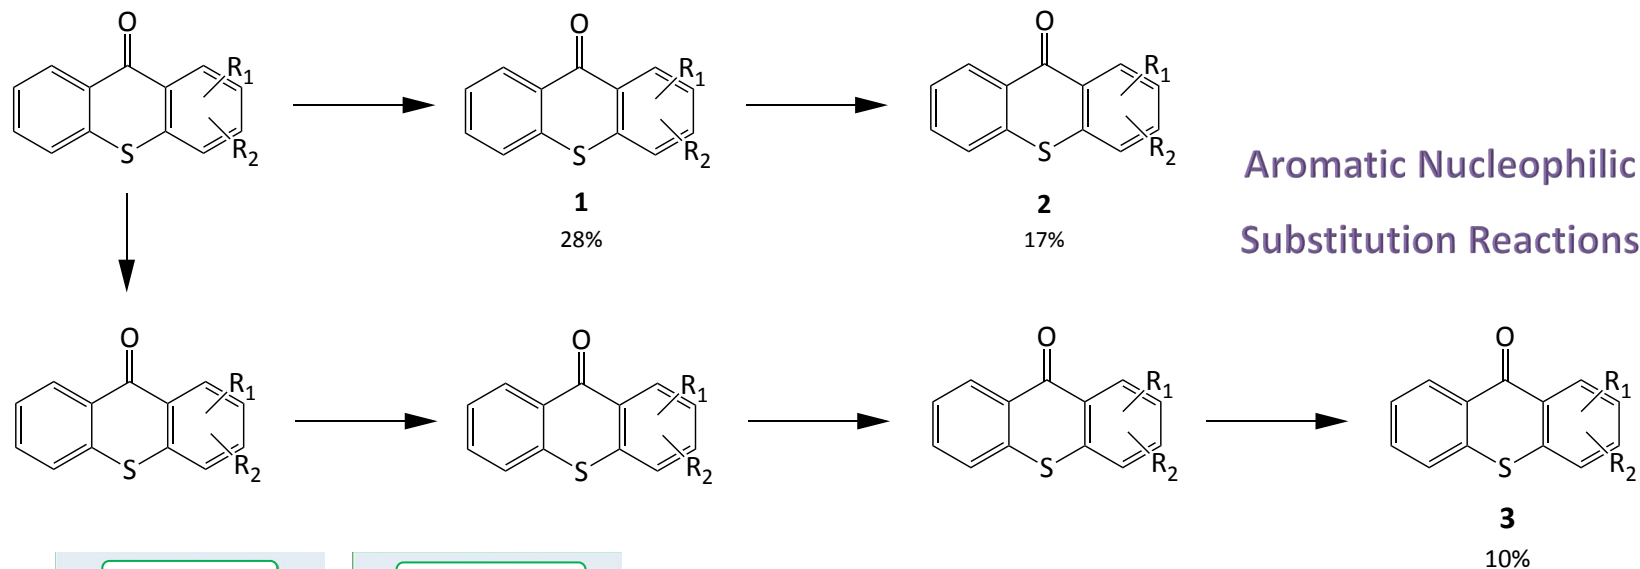

Aromatic Nucleophilic  
Substitution Reactions

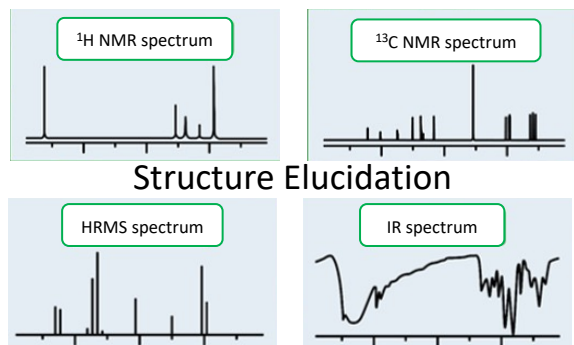

3 Aminothioxanthenes  
Potential Novel Antifungal  
Compounds

# Results and Discussion

Broth microdilution method

CLSI: M38-A2

Fluconazole (FL) as a reference drug

**Table 1.** Antifungal activity (MIC<sup>1</sup> and MFC<sup>1</sup>, µg/mL) of thioxanthone derivatives against filamentous fungi strains.

| Filamentous Fungi Strains                | Compounds |      |      |      |      |      | FL   |      |
|------------------------------------------|-----------|------|------|------|------|------|------|------|
|                                          | 1         |      | 8    |      | 9    |      | MIC  | MFC  |
|                                          | MIC       | MFC  | MIC  | MFC  | MIC  | MFC  | MIC  | MFC  |
| <i>Aspergillus fumigatus</i> ATCC 240305 | 32        | >128 | 32   | >128 | 64   | ≥128 | ≥128 | >128 |
| <i>A. fumigatus</i> C111                 | 32        | >128 | 32   | >128 | 64   | 64   | ≥128 | >128 |
| <i>A. niger</i> ATCC 16404               | 32        | >128 | 32   | >128 | 128  | >128 | ≥128 | >128 |
| <i>A. flavus</i> F44                     | >128      | >128 | >128 | >128 | >128 | >128 | 128  | >128 |
| <i>Fusarium solani</i> FF125             | 64        | >128 | 128  | >128 | >128 | >128 | ≥128 | >128 |
| <i>F. oxysporum</i> FF115                | 64        | 128  | 64   | 64   | 128  | 128  | 64   | >128 |
| <i>Scedosporium</i> spp.                 | 8         | 8    | 16   | 16   | 32   | 32   | 4    | 16   |
| <i>Lichtheimia</i> spp.                  | 16        | 16   | 32   | 64   | 64   | 64   | 64   | >128 |
| <i>Mucor</i> spp.                        | 16        | 16   | 16   | 16   | 32   | 32   | >128 | >128 |
| <b>Dermatophytes</b>                     |           |      |      |      |      |      |      |      |
| <i>Trichophyton rubrum</i> FF5           | 16        | 16   | 8    | 8    | 32   | 32   | 1    | 64   |
| <i>T. mentagrophytes</i> FF7             | 16        | 16   | 16   | 32   | 32   | 64   | 8    | 32   |
| <i>Nannizzia gypsea</i> FF3              | 16        | 32   | 16   | 16   | 32   | 64   | 32   | ≥128 |
| <i>Microsporum canis</i> FF1             | 32        | 64   | 16   | 32   | 32   | 64   | 32   | ≥128 |

<sup>1</sup> MIC: minimal inhibitory concentration and MFC: minimal fungicidal concentration

CLSI. Reference Method for Broth Dilution Antifungal Susceptibility Testing of Filamentous Fungi, Approved Standard—2nd ed.; Document M38-A2; CLSI: Wayne, PA, USA, 2008.

ECMC  
2022

The 8th International Electronic  
Conference on Medicinal Chemistry  
01–30 NOVEMBER 2022 | ONLINE

# Conclusions

Thioxanthenes as new models for developing innovative antifungal agents.

**3 (Amino)thioxanthenes** showed interesting results against drug-resistant strains of filamentous fungi.

Potential interest as an alternative to the conventional treatment of fungal infections, and in the prevention and control of persistent infections.

# Acknowledgments

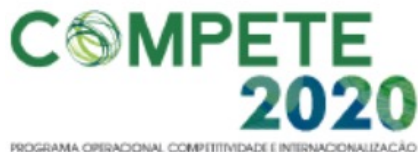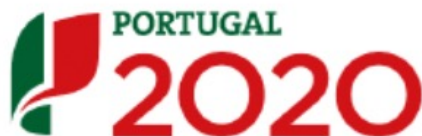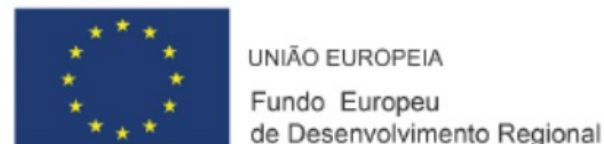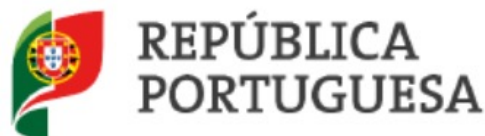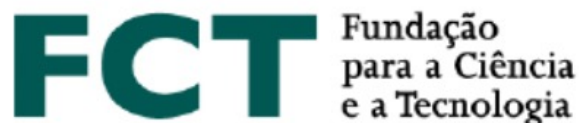

This research was funded by national funds through FCT - Foundation for Science and Technology within the scope of UIDB/04423/2020, UIDP/04423/2020, and under the projects PTDC/SAU-PUB/28736/2017, EXPL/CTA-AMB/0810/2021, and PTDC/CTA-AMB/0853/2021, co-financed by COMPETE 2020, Portugal 2020 and the European Union through the ERDF and by FCT through national funds and by the structured program of R&D&I ATLANTIDA (reference NORTE-01-0145-FEDER-000040), supported by the North Portugal Regional Operational Programme (NORTE2020), through the ERDF. Fernando Durães acknowledges FCT for his PhD grant (SFRH/BD/144681/2019).
